# Supplementary material for: Predicting prognosis using stroke-heart indicator: brain natriuretic peptide in patients with aneurysmal subarachnoid hemorrhage
Source: Front Neurol. 2025 Jan 22;16:1510235. doi: 10.3389/fneur.2025.1510235 (PMC11794076; doi:10.3389/fneur.2025.1510235)
Supplement: Supplementary file 1 [file Data_Sheet_1.pdf]

| Positive if Greater Than or Equal to | Sensitivity | 1 - Specificity | Youden index |
|--------------------------------------|-------------|-----------------|--------------|
| 61.3                                 | 0.632       | 0.444           | 0.188        |
| 61.15                                | 0.632       | 0.445           | 0.187        |
| 61.1                                 | 0.661       | 0.476           | 0.185        |
| 61.05                                | 0.632       | 0.447           | 0.185        |
| 63.95                                | 0.62        | 0.435           | 0.185        |
| 60.95                                | 0.632       | 0.448           | 0.184        |
| 60.5                                 | 0.625       | 0.436           | 0.183        |
| 63.55                                | 0.62        | 0.436           | 0.184        |
| 60.85                                | 0.632       | 0.449           | 0.183        |
| 61.75                                | 0.626       | 0.443           | 0.183        |
| 52.65                                | 0.684       | 0.502           | 0.182        |
| 54.55                                | 0.673       | 0.491           | 0.182        |
| 56.7                                 | 0.655       | 0.473           | 0.182        |
| 61.5                                 | 0.625       | 0.436           | 0.182        |
| 63.1                                 | 0.625       | 0.436           | 0.182        |
| 55.8                                 | 0.661       | 0.48            | 0.181        |
| 56.55                                | 0.655       | 0.474           | 0.181        |
| 60.2                                 | 0.637       | 0.456           | 0.181        |
| 62.85                                | 0.62        | 0.439           | 0.181        |
| 60.75                                | 0.632       | 0.452           | 0.18         |
| 62.5                                 | 0.632       | 0.44            | 0.18         |
| 60.45                                | 0.659       | 0.469           | 0.179        |
| 53.55                                | 0.678       | 0.499           | 0.179        |
| 54.35                                | 0.673       | 0.494           | 0.179        |
| 55.6                                 | 0.661       | 0.482           | 0.179        |
| 56.4                                 | 0.655       | 0.476           | 0.179        |
| 60.65                                | 0.632       | 0.453           | 0.179        |
| 52.25                                | 0.684       | 0.506           | 0.178        |
| 64.5                                 | 0.657       | 0.469           | 0.178        |
| 59.5                                 | 0.657       | 0.469           | 0.178        |
| 62.2                                 | 0.62        | 0.442           | 0.178        |
| 52.95                                | 0.678       | 0.501           | 0.177        |
| 54.75                                | 0.667       | 0.49            | 0.177        |
| 57.3                                 | 0.649       | 0.472           | 0.177        |
| 59.65                                | 0.637       | 0.46            | 0.177        |
| 60.55                                | 0.632       | 0.455           | 0.177        |
| 54.25                                | 0.659       | 0.477           | 0.177        |
| 55.4                                 | 0.661       | 0.485           | 0.176        |
| 57                                   | 0.649       | 0.473           | 0.176        |
| 59.35                                | 0.637       | 0.461           | 0.176        |
| 60.4                                 | 0.632       | 0.456           | 0.176        |
| 51.9                                 | 0.684       | 0.509           | 0.175        |
| 54.05                                | 0.673       | 0.498           | 0.175        |
| 53.15                                | 0.673       | 0.498           | 0.175        |
| 53.55                                | 0.673       | 0.498           | 0.174        |
| 59.05                                | 0.637       | 0.463           | 0.174        |
| 64.1                                 | 0.608       | 0.434           | 0.174        |
| 51.75                                | 0.684       | 0.511           | 0.173        |
| 58.8                                 | 0.637       | 0.464           | 0.173        |
| 58.65                                | 0.637       | 0.465           | 0.172        |
| 55.55                                | 0.643       | 0.472           | 0.171        |
| 64.3                                 | 0.657       | 0.466           | 0.171        |
| 51.65                                | 0.684       | 0.514           | 0.17         |
| 48.1                                 | 0.713       | 0.543           | 0.17         |
| 57.95                                | 0.637       | 0.468           | 0.169        |
| 51.35                                | 0.684       | 0.516           | 0.168        |
| 57.85                                | 0.637       | 0.469           | 0.168        |
| 47.85                                | 0.713       | 0.545           | 0.168        |
| 52.75                                | 0.684       | 0.517           | 0.167        |
| 47.75                                | 0.684       | 0.519           | 0.165        |
| 47.65                                | 0.713       | 0.548           | 0.165        |
| 44.85                                | 0.731       | 0.569           | 0.162        |
| 50.8                                 | 0.684       | 0.522           | 0.162        |
| 64.3                                 | 0.596       | 0.434           | 0.162        |
| 47.5                                 | 0.713       | 0.551           | 0.162        |
| 47.15                                | 0.731       | 0.57            | 0.161        |
| 45.85                                | 0.725       | 0.564           | 0.161        |
| 50.55                                | 0.684       | 0.523           | 0.161        |
| 47.35                                | 0.713       | 0.552           | 0.161        |
| 45.4                                 | 0.725       | 0.565           | 0.16         |
| 50.35                                | 0.684       | 0.524           | 0.16         |
| 47.25                                | 0.713       | 0.553           | 0.159        |
| 44.05                                | 0.737       | 0.578           | 0.159        |
| 44.4                                 | 0.731       | 0.573           | 0.158        |
| 47.1                                 | 0.713       | 0.555           | 0.158        |
| 43.85                                | 0.737       | 0.58            | 0.157        |
| 50.25                                | 0.684       | 0.527           | 0.157        |
| 47.45                                | 0.731       | 0.547           | 0.157        |
| 46.95                                | 0.713       | 0.556           | 0.157        |
| 42.15                                | 0.749       | 0.593           | 0.156        |
| 43.65                                | 0.737       | 0.581           | 0.156        |
| 44.95                                | 0.725       | 0.569           | 0.156        |
| 50.1                                 | 0.684       | 0.528           | 0.156        |
| 46.8                                 | 0.713       | 0.557           | 0.156        |
| 48.3                                 | 0.684       | 0.524           | 0.156        |
| 42                                   | 0.749       | 0.594           | 0.155        |
| 43.55                                | 0.737       | 0.582           | 0.155        |
| 44.25                                | 0.731       | 0.576           | 0.155        |
| 46.15                                | 0.719       | 0.564           | 0.155        |
| 46.4                                 | 0.713       | 0.558           | 0.155        |
| 43.9                                 | 0.737       | 0.583           | 0.154        |
| 49.9                                 | 0.684       | 0.533           | 0.154        |
| 64.75                                | 0.585       | 0.431           | 0.154        |
| 49.2                                 | 0.69        | 0.536           | 0.154        |
| 42.45                                | 0.743       | 0.59            | 0.153        |
| 44.15                                | 0.731       | 0.578           | 0.153        |
| 49.7                                 | 0.684       | 0.531           | 0.153        |
| 48.45                                | 0.696       | 0.543           | 0.153        |
| 49.05                                | 0.684       | 0.537           | 0.153        |
| 41.65                                | 0.749       | 0.597           | 0.152        |
| 42.25                                | 0.743       | 0.585           | 0.152        |
| 43.35                                | 0.737       | 0.585           | 0.152        |
| 46.45                                | 0.713       | 0.561           | 0.152        |
| 41.2                                 | 0.749       | 0.598           | 0.151        |
| 43.25                                | 0.737       | 0.586           | 0.151        |
| 64.6                                 | 0.585       | 0.434           | 0.151        |
| 48.35                                | 0.684       | 0.533           | 0.151        |
| 48.9                                 | 0.699       | 0.539           | 0.151        |
| 42.9                                 | 0.737       | 0.587           | 0.15         |
| 133.35                               | 0.351       | 0.201           | 0.15         |
| 48.75                                | 0.69        | 0.54            | 0.15         |
| 46.25                                | 0.713       | 0.564           | 0.149        |
| 64.95                                | 0.579       | 0.43            | 0.149        |
| 133.15                               | 0.351       | 0.202           | 0.149        |
| 46.5                                 | 0.749       | 0.601           | 0.148        |
| 40.9                                 | 0.749       | 0.601           | 0.148        |
| 133.35                               | 0.357       | 0.209           | 0.148        |
| 68.25                                | 0.561       | 0.414           | 0.148        |
| 40.75                                | 0.749       | 0.602           | 0.147        |
| 132.6                                | 0.357       | 0.21            | 0.147        |
| 134.95                               | 0.351       | 0.204           | 0.146        |
| 48.55                                | 0.737       | 0.583           | 0.146        |
| 67.55                                | 0.561       | 0.415           | 0.146        |
| 40.55                                | 0.749       | 0.603           | 0.146        |
| 137.85                               | 0.339       | 0.193           | 0.146        |
| 134.55                               | 0.351       | 0.205           | 0.146        |
| 40.35                                | 0.749       | 0.604           | 0.145        |
| 137.35                               | 0.339       | 0.194           | 0.145        |
| 132                                  | 0.351       | 0.212           | 0.145        |
| 134.1                                | 0.351       | 0.206           | 0.145        |
| 67.25                                | 0.567       | 0.422           | 0.145        |
| 135.7                                | 0.345       | 0.2             | 0.145        |
| 131.45                               | 0.357       | 0.213           | 0.144        |
| 66.9                                 | 0.567       | 0.423           | 0.144        |
| 67.45                                | 0.561       | 0.418           | 0.143        |
| 68.55                                | 0.556       | 0.413           | 0.143        |
| 40.25                                | 0.749       | 0.606           | 0.143        |
| 130.95                               | 0.351       | 0.214           | 0.143        |
| 65.15                                | 0.573       | 0.43            | 0.143        |
| 66.25                                | 0.567       | 0.424           | 0.143        |
| 40.1                                 | 0.749       | 0.607           | 0.142        |
| 136.8                                | 0.339       | 0.197           | 0.142        |
| 138.95                               | 0.333       | 0.191           | 0.142        |
| 141.5                                | 0.337       | 0.185           | 0.142        |
| 144.4                                | 0.322       | 0.18            | 0.142        |
| 133.85                               | 0.351       | 0.209           | 0.142        |
| 102.05                               | 0.421       | 0.279           | 0.142        |
| 67.35                                | 0.561       | 0.42            | 0.141        |
| 136.3                                | 0.339       | 0.198           | 0.141        |
| 138.85                               | 0.333       | 0.192           | 0.141        |
| 143.3                                | 0.351       | 0.211           | 0.141        |
| 130.2                                | 0.351       | 0.216           | 0.141        |
| 65.75                                | 0.567       | 0.426           | 0.141        |
| 101.35                               | 0.421       | 0.28            | 0.141        |
| 138.4                                | 0.333       | 0.193           | 0.14         |
| 128.85                               | 0.357       | 0.217           | 0.14         |
| 65.45                                | 0.567       | 0.427           | 0.14         |
| 101.65                               | 0.421       | 0.281           | 0.14         |
| 127.1                                | 0.351       | 0.212           | 0.139        |
| 140.5                                | 0.327       | 0.188           | 0.139        |
| 128.05                               | 0.357       | 0.218           | 0.139        |
| 65.25                                | 0.567       | 0.428           | 0.139        |
| 39.95                                | 0.749       | 0.611           | 0.138        |
| 71.9                                 | 0.532       | 0.394           | 0.138        |
| 100.8                                | 0.351       | 0.203           | 0.138        |
| 129.45                               | 0.357       | 0.219           | 0.138        |
| 142.5                                | 0.322       | 0.184           | 0.138        |
| 151.05                               | 0.31        | 0.172           | 0.138        |
| 68.75                                | 0.55        | 0.413           | 0.137        |
| 39.85                                | 0.749       | 0.612           | 0.137        |
| 98.35                                | 0.427       | 0.29            | 0.137        |
| 100.55                               | 0.421       | 0.284           | 0.137        |
| 142.2                                | 0.357       | 0.216           | 0.137        |
| 145.1                                | 0.316       | 0.179           | 0.137        |
| 149.8                                | 0.31        | 0.173           | 0.137        |
| 71.6                                 | 0.532       | 0.396           | 0.136        |
| 72.85                                | 0.506       | 0.39            | 0.136        |
| 100.45                               | 0.421       | 0.285           | 0.136        |
| 144.9                                | 0.316       | 0.18            | 0.136        |
| 127.55                               | 0.357       | 0.221           | 0.136        |
| 149.3                                | 0.316       | 0.18            | 0.136        |
| 39.75                                | 0.749       | 0.614           | 0.135        |
| 71.35                                | 0.532       | 0.397           | 0.135        |
| 97.8                                 | 0.427       | 0.292           | 0.135        |
| 100.1                                | 0.421       | 0.286           | 0.135        |
| 110.25                               | 0.386       | 0.251           | 0.135        |
| 143.75                               | 0.351       | 0.215           | 0.135        |
| 127.05                               | 0.351       | 0.216           | 0.135        |
| 68.95                                | 0.544       | 0.41            | 0.134        |
| 72.55                                | 0.526       | 0.392           | 0.134        |
| 109.8                                | 0.386       | 0.252           | 0.134        |
| 145.95                               | 0.31        | 0.176           | 0.134        |
| 125.2                                | 0.363       | 0.229           | 0.134        |
| 126.9                                | 0.357       | 0.223           | 0.134        |
| 39.55                                | 0.749       | 0.608           | 0.134        |
| 71.25                                | 0.532       | 0.399           | 0.133        |
| 72.25                                | 0.526       | 0.393           | 0.133        |
| 97.65                                | 0.427       | 0.294           | 0.133        |
| 99.75                                | 0.421       | 0.288           | 0.133        |
| 111.4                                | 0.38        | 0.247           | 0.133        |
| 124.1                                | 0.363       | 0.23            | 0.133        |
| 69.55                                | 0.537       | 0.406           | 0.132        |
| 81.7                                 | 0.485       | 0.366           | 0.132        |
| 99.6                                 | 0.421       | 0.289           | 0.132        |
| 109.4                                | 0.386       | 0.254           | 0.132        |
| 152.5                                | 0.304       | 0.172           | 0.132        |
| 122.8                                | 0.363       | 0.231           | 0.132        |
| 126.65                               | 0.357       | 0.225           | 0.132        |
| 69.6                                 | 0.538       | 0.407           | 0.131        |
| 28.35                                | 0.749       | 0.608           | 0.131        |
| 71.1                                 | 0.532       | 0.401           | 0.131        |
| 86.95                                | 0.462       | 0.331           | 0.131        |
| 88.4                                 | 0.456       | 0.325           | 0.131        |
| 97.45                                | 0.427       | 0.296           | 0.131        |
| 99.15                                | 0.421       | 0.29            | 0.131        |
| 104.15                               | 0.404       | 0.273           | 0.131        |
| 109.15                               | 0.404       | 0.255           | 0.131        |
| 126.3                                | 0.357       | 0.259           | 0.131        |
| 39.25                                | 0.749       | 0.619           | 0.13         |
| 70.95                                | 0.532       | 0.402           | 0.13         |
| 72.95                                | 0.52        | 0.39            | 0.13         |
| 80.8                                 | 0.485       | 0.355           | 0.13         |
| 86.75                                | 0.462       | 0.332           | 0.13         |
| 87.85                                | 0.456       | 0.328           | 0.13         |
| 93.47                                | 0.457       | 0.309           | 0.13         |
| 97.2                                 | 0.427       | 0.297           | 0.13         |
| 109.05                               | 0.386       | 0.256           | 0.13         |
| 110.75                               | 0.38        | 0.25            | 0.13         |
| 121.1                                | 0.363       | 0.233           | 0.13         |
| 126.05                               | 0.357       | 0.227           | 0.13         |
| 102.55                               | 0.409       | 0.279           | 0.13         |
| 69.3                                 | 0.538       | 0.409           | 0.129        |
| 97.1                                 | 0.766       | 0.637           | 0.129        |
| 38.05                                | 0.76        | 0.631           | 0.129        |
| 39.15                                | 0.749       | 0.62            | 0.129        |
| 70.7                                 | 0.532       | 0.403           | 0.129        |
| 73.4                                 | 0.515       | 0.386           | 0.129        |
| 78.05                                | 0.497       | 0.368           | 0.129        |
| 84.9                                 | 0.468       | 0.339           | 0.129        |
| 81.75                                | 0.485       | 0.357           | 0.129        |
| 92.95                                | 0.439       | 0.31            | 0.129        |
| 96.75                                | 0.427       | 0.298           | 0.129        |
| 103.85                               | 0.404       | 0.275           | 0.129        |
| 105.45                               | 0.398       | 0.269           | 0.129        |
| 106.8                                | 0.392       | 0.263           | 0.129        |
| 120.05                               | 0.363       | 0.234           | 0.129        |
| 124.75                               | 0.357       | 0.235           | 0.129        |
| 71.95                                | 0.497       | 0.369           | 0.128        |
| 80.5                                 | 0.485       | 0.357           | 0.128        |
| 84.7                                 | 0.468       | 0.34            | 0.128        |
| 86.6                                 | 0.462       | 0.334           | 0.128        |
| 89.55                                | 0.45        | 0.322           | 0.128        |
| 101.9                                | 0.439       | 0.311           | 0.128        |
| 103.35                               | 0.404       | 0.276           | 0.128        |
| 106.4                                | 0.392       | 0.264           | 0.128        |
| 108.95                               | 0.386       | 0.258           | 0.128        |
| 112.9                                | 0.374       | 0.246           | 0.128        |
| 119.45                               | 0.363       | 0.235           | 0.128        |
| 37.75                                | 0.76        | 0.633           | 0.127        |
| 39.05                                | 0.749       | 0.622           | 0.127        |
| 70.3                                 | 0.532       | 0.405           | 0.127        |
| 72.5                                 | 0.517       | 0.388           | 0.127        |
| 79.1                                 | 0.491       | 0.364           | 0.127        |
| 86.25                                | 0.462       | 0.335           | 0.127        |
| 87.35                                | 0.456       | 0.329           | 0.127        |
| 89.2                                 | 0.45        | 0.323           | 0.127        |
| 94.35                                | 0.433       | 0.306           | 0.127        |
| 96.2                                 | 0.427       | 0.3             | 0.127        |
| 103.05                               | 0.408       | 0.277           | 0.127        |
| 108.25                               | 0.392       | 0.265           | 0.127        |
| 112.3                                | 0.374       | 0.247           | 0.127        |
| 36.55                                | 0.766       | 0.64            | 0.126        |
| 73.15                                | 0.515       | 0.389           | 0.126        |
| 77.85                                | 0.497       | 0.371           | 0.126        |
| 78.65                                | 0.491       | 0.365           | 0.126        |
| 80.9                                 | 0.485       | 0.359           | 0.126        |
|                                      |             |                 |              |

|               | Estimate    | Std.Error   | Lower        | Upper       |
|---------------|-------------|-------------|--------------|-------------|
| NRI           | 0.011104195 | 0.013233431 | -0.014201940 | 0.03837042  |
| NRI+          | 0.005847953 | 0.012899935 | -0.017804311 | 0.03125122  |
| NRI-          | 0.005256242 | 0.002622588 | 0.001291156  | 0.01065957  |
| Pr(Up Case)   | 0.017543860 | 0.009781655 | 0.000000000  | 0.03921599  |
| Pr(Down Case) | 0.011695906 | 0.008172459 | 0.000000000  | 0.03021176  |
| Pr(Down ctrl) | 0.005256242 | 0.002622588 | 0.001291156  | 0.01065957  |
| Pr(Up ctrl)   | 0.000000000 | 0.000000000 | 0.000000000  | 0.000000000 |

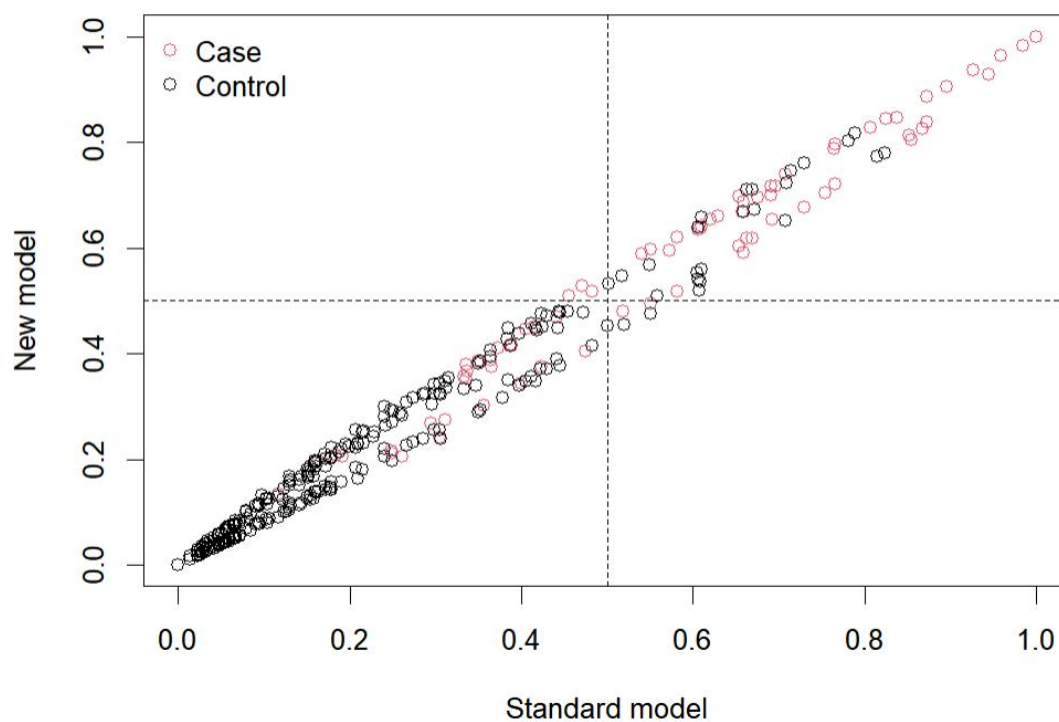

NRI=0.0111 (-0.0142-0.0384), P=0.401

Model 1 AUC: 0.828

```
> cat("Model 2 AUC:", round(auc(roc2), 3), "\n")
```

Model 2 AUC: 0.828

```
> delong_test <- roc.test(roc1, roc2, method = "delong")
```

```
> cat("DeLong Test P-Value:", delong_test$p.value, "\n")
```

DeLong Test P-Value: 0.5968959

$P > 0.05$ , It is considered that the AUC of both models A and B may not be significant
